# Supplementary material
Source: HighWire-hosted journal article supplement (http://gut.bmjjournals.com/highwire/filestream/193115/field_highwire_adjunct_files/3/Supplemental_Table_1_primers.pdf)
Supplement: Supplemental_Table_1_primers.pdf [file Supplemental_Table_1_primers.pdf]

**Supplemental Table1: Primers used for Real time QRT-PCR**

Mouse primers:

| <i>GENE</i>           | <i>SEQUENCE</i>    |                                                          |
|-----------------------|--------------------|----------------------------------------------------------|
| Collagen I $\alpha$ 1 | Sense<br>Antisense | GAGCGGAGAGTACTGGATCG<br>GCTTCTTTTCCTTGGGGTTC             |
| $\alpha$ sma          | Sense<br>Antisense | AAACAGGAATACGACGAAG<br>CAGGAATGATTTGGAAAGGA              |
| Tgf $\beta$           | Sense<br>Antisense | TTGCCCTCTACAACCAACACAA<br>GGCTTGCGACCCACGTAGTA           |
| OPN                   | Sense<br>Antisense | CTC CAT CGT CAT CAT CAT CG<br>TGC ACC CAG ATC CTA TAG CC |
| Gli2                  | Sense<br>Antisense | ACCATGCCTACCCAACTCAG<br>CTGCTCCTGTGTCAGTCCAA             |
| Inh                   | Sense<br>Antisense | ACAGATGGAATGCGTGTGAA<br>CCGAACCTTCATCTTGGTG              |
| s9                    | Sense<br>Antisense | GACTCCGGAACAAACGTGAGGT<br>CTTCATCTTGCCCTCGTCCA           |
